# 1 **Maintaining robust size across environmental conditions through plastic brain** 2 **growth dynamics**

3  
4 **Ansa E. Cobham<sup>1\*</sup>, Brent Neumann<sup>2</sup>, Christen K. Mirth<sup>1\*</sup>**

5  
6 <sup>1</sup>School of Biological sciences, Monash University, Melbourne, Australia

7 <sup>2</sup>Neuroscience Program, Monash Biomedicine Discovery Institute and Department of Anatomy  
8 and Developmental Biology, Monash University, Melbourne, Australia

9

10 **\*Correspondence:** ansacobham@yahoo.com, christen.mirth@monash.edu

11

12 **Keywords:** whole brain, mushroom bodies, insulin signaling, growth rate, plasticity, robustness,

13

14 **Running Title:** Different growth dynamics regulate robustness in brain size

15

16

## 17 **Abstract**

18 Organ growth is tightly regulated across environmental conditions to generate appropriate final  
19 size. While the size of some organs is free to vary, others need to maintain constant size to  
20 function properly. This poses a unique problem: how is robust final size achieved when  
21 environmental conditions can alter some major growth processes? While we know that brain  
22 growth is “spared” from the effects of the environment from humans to fruit flies, we do not  
23 understand how this process alters growth dynamics across brain compartments. Here, we  
24 explore how this robustness in brain size is achieved by examining differences in growth  
25 patterns between the larval body, the brain, and a brain compartment – the mushroom bodies  
26 – in *Drosophila melanogaster* across both thermal and nutritional conditions. We identify key  
27 differences in patterns of growth between the whole brain and mushroom bodies that are likely  
28 to underlie robustness of final organ shape. Further, we show that these differences produce  
29 distinct brain shapes across environments.

30

## 31 **Significance of Study**

32 A long-standing question in Biology has been how fully functional multicellular organisms with  
33 highly specialized organs are generated, given that organs initiate growth at different times  
34 across development. Although the genetic mechanisms that underlie growth has been studied  
35 extensively, we are yet to understand how growth pattern of organs produces distinct final  
36 shapes across changing environmental conditions. We use the *Drosophila* brain, to reveal that  
37 key differences in growth dynamics are likely to underlie robustness of final organ shape and  
38 are tuned by nutrition and temperature. Further deepening our knowledge of how final organ  
39 shape is maintained across environmental conditions.

40

## 41 **Introduction**

42 How are the shapes and sizes of growing organs regulated throughout development to  
43 generate a fully functional multicellular animal with highly specialized parts? This seems  
44 particularly difficult to understand given that body parts initiate growth at different times, and  
45 further grow at different rates and with differing dynamics (Andersen et al., 2013; Eder et al.,  
46 2017; Huxley, 1932). While some organs show exquisite sensitivity to environmental conditions,  
47 known as plasticity, changing their shape and size with changes in nutrition, temperature, and  
48 other conditions (Bateson, 2017); other organs maintain relatively constant final sizes across  
49 conditions (Bateson, 2017; Nijhout, 2002). The properties that allow growth to resist  
50 perturbations in environmental conditions contribute to robustness in development (Bateson,  
51 2017; Mirth & Shingleton, 2019; Nijhout, 2002). As organs vary in sensitivity to environmental  
52 perturbations, animals that develop in different environments will differ in their body size and  
53 shape (Mirth & Shingleton, 2012). Understanding the properties of organ growth that allow  
54 them to be either plastic or robust to environmental conditions is key to uncovering how  
55 correct, functional body form is achieved

56 Extensive studies in insects have described how the patterns of growth across organs  
57 generate variation in size and shape of the adult body (Andersen et al., 2013; Mirth &  
58 Shingleton, 2012, 2019; Nijhout et al., 2014). Varying growth dynamics can occur either at the  
59 level of an individual organ or through coordinating growth processes among organs relative to  
60 the growing body (Huxley, 1932; Shingleton & Frankino, 2018). Also, environmental conditions  
61 can act to alter each of these growth properties (Miner et al., 2000; Nijhout & Grunert, 2010;  
62 Shingleton et al., 2009; Shingleton et al., 2008).

63 Across a wide variety of animals, including mammals and insects, the brain is generally less  
64 sensitive to changes in environmental conditions than other organs of the body (Cusick &  
65 Georgieff, 2016). This is commonly referred to as brain sparing (Cohen et al., 2015). In humans,  
66 newborns raised under reduced nutrient availability or oxygen supply have reduced weight and  
67 body sizes, and disproportionately large heads (Cohen et al., 2015; Cox & Marton, 2009).  
68 Illustrating that the brain has built-in mechanisms to ensure its size is not compromised.

69 Brain differentiation in *Drosophila*, occurs in the embryo, a stage that is protected from  
70 nutrient restriction as the embryos are not fed. However, most brain growth occurs during the  
71 larval stages, and nutrition plays an important role (Yuan et al., 2020). Poor nutrition, especially  
72 in the later stages of larval development, produces small sized adults (Mirth & Shingleton,  
73 2012), but with proportionally larger brains than those reared under nutrient rich conditions  
74 (Cheng et al., 2011). Brain growth is spared against poor nutrition via the action of the glial  
75 secreted tyrosine kinase-like insulin receptor called Alk and its ligand Jelly Belly (Jeb) (Cheng et  
76 al., 2011). Alk activates downstream effectors of the insulin signalling pathway and downstream  
77 targets of the Target of Rapamycin (TOR) kinase bypassing amino-acid sensing in the absence of  
78 nutrient cues, to ensure that the size and composition of cells in the brain is maintained even  
79 when larvae are starved (Cheng et al., 2011; Lanet & Murance, 2014).

80 While these findings highlight a genetic mechanism through which brain sparing occurs,  
81 they do not explain how brain growth adjusts with extended larval growth periods caused by  
82 poor nutrition. If Alk signalling maintains high growth rates in starved larvae as it does in fed,  
83 the extension of developmental time caused by starvation would cause brains to overgrow. But

84 since this does not happen, it suggests that the growth dynamics in brains of starved larvae  
85 adjust to avoid overshooting their size with longer growth periods.

86 This could happen in several ways (Fig 1). Firstly, when larvae are starved, they could  
87 maintain constant growth rates within the brain, but then stop growing once a target size is  
88 reached (Figure 1A). This would result in a growth trajectory that reaches an asymptote.  
89 Alternatively, starved larvae could delay the time at which they initiate brain growth, but once  
90 initiated, they maintain constant growth rates (Figure 1A). Larvae raised under different  
91 nutritional conditions would show exponential growth trajectories, where exponential growth  
92 would be initiated at different times depending on the rearing conditions of the larvae (lagged  
93 exponential model). Finally, *Jeb* and *Alk* might not act to ensure insulin and TOR signalling are  
94 maintained at constant levels. Instead, these pathways might tune both growth rates and the  
95 timing at which growth is initiated, to adjust for the extended growth period (Figure 1A). This  
96 would result in changes in both the time at which growth was initiated as well as the growth rate.  
97 These differences in growth dynamics are important, as each implies a different mechanism for  
98 adjusting brain size with environmental conditions.

99 Compared to the overall, different neuronal subclasses vary their rates of cell division in  
100 response to nutrition and other environmental conditions like temperature, light, and  
101 population densities during larval stages of growth (Heisenberg et al., 1995; Lin et al., 2013;  
102 Prokop & Technau, 1994; Wang et al., 2018). As most neuroblast populations enter quiescence  
103 in the early larval stages, the neuroblasts that give rise to the mushroom bodies – the paired  
104 neuronal structures important for olfactory processing and learning – continue to divide and  
105 differentiate from the first instar (L1) stage onwards. (Kunz et al., 2012). When faced with  
106 extremely poor nutritional conditions that reduce larval growth, the mushroom body neurons  
107 maintain division of the same neuronal cell types without differentiating (Lin et al., 2013; Rossi  
108 et al., 2017). In contrast to the mushroom bodies, the optic lobe neurons, which receive  
109 sensory input from the visual system, are only activated late in larval development and are  
110 highly sensitive to changes in nutritional environment, with the size of the neuron pool involved  
111 in initial proliferation highly dependent on nutrient availability (Lanet & Maurange, 2014). This  
112 suggests that specific brain regions differ in how they protect the whole brain from  
113 environmental perturbations.

114 These findings allow us to further propose a model of how the mushroom body  
115 compartments of the brain might maintain constant size in the face of changing environmental  
116 conditions. Firstly, because neuroblasts such as those that give rise to the mushroom body  
117 neurons begin proliferating much earlier than the majority of the brain neuroblasts, and  
118 proliferate throughout the larval instars, we might expect the size of these structures to  
119 increase constantly, or linearly, throughout larval development (Figure 1B). Most of the  
120 remaining neuroblasts of the brain initiate proliferation late in the second instar. Thus, we  
121 would expect a period of little or no discernible growth across the whole brain in the first two  
122 instars, punctuated by a rapid onset of growth in later development that would be best  
123 characterized by exponential growth with a time lag to its onset (Figure 1B). This would mean  
124 that growth dynamics in the mushroom body could differ significantly from that of the whole  
125 brain. Differences in their dynamics could indicate that growth is mediated by differing

126 mechanisms between compartments, potentially dictating their response to environmental  
127 cues.

128 In the current study, we aim to determine how brain growth dynamics are regulated to  
129 ensure robust size across different environmental conditions, and whether all compartments of  
130 the brain regulate these dynamics in the same manner. To address this, we compared the  
131 growth patterns of whole brains and mushroom bodies, relative to the larval body, under  
132 standard rearing conditions. We then used altered nutritional and thermal conditions to  
133 explore how the dynamics of brain growth respond to environmental change. These studies  
134 reveal differences in the way the mushroom body compartment regulates its growth when  
135 compared to the whole brain, and highlight how growth dynamics are tuned by nutrition and  
136 temperature. With these studies, we deepen our understanding of how different brain regions  
137 maintain robustness across environmental conditions.

## 138 **RESULTS**

### 139 **Comparing the growth dynamics of the larval body, whole brain, and mushroom bodies** 140 **across larval development**

141 Given that the mushroom body neuroblasts show different patterns of growth to the  
142 majority of other neuroblasts in the brain, our first goal was to devise methods to compare  
143 mushroom body growth to whole brain and larval body growth across all three larval instars. To  
144 ensure that we compared the growth of the same structures across developmental time, we  
145 required a marker that would be expressed throughout all three instars. Using the expression  
146 data available from the Janelia FlyLight project (<http://flweb.janelia.org/cgi-bin/flew.cgi>), we  
147 found that the GMR38E10 GAL4 line drove GFP expression in the vertical and medial lobes of  
148 the mushroom body neurons from hatch through to pupariation (Supplementary Figure 1). In  
149 the late L3 stage, GFP expression was not apparent in the mushroom body calyx  
150 (Supplementary Figure 1), which is the dendritic projections of Kenyon cell bodies  
151 (Supplementary Figure 2a and 2b). Thus, to be able to compare measurements across all stages  
152 of development we excluded the calyx and peduncles from our analyses and measured only the  
153 ventral and medial lobes for mushroom body volume (Supplementary Figure 2a and 2b).

154 We next sought to compare the dynamics of larval, whole brain, and mushroom body  
155 growth. Log-transformed larval growth increased steadily throughout the first, second, and  
156 third instar stages (Supplementary Figure 3A-C, Supplementary Table 1). Linear models explain  
157 68%, 55%, and 78% of the variation in larval volume over time for L1, L2, and L3 respectively  
158 (Supplementary Table 1, adjusted  $R^2$  values). Similarly, the mushroom body displayed steady  
159 linear growth throughout all three instars (Supplementary Figure 3G-I, Supplementary Table 1),  
160 with linear models explaining 43%, 55%, and 77% of the variance in mushroom body volume  
161 over time for the L1, L2, and L3 respectively (Supplementary Table 1, adjusted  $R^2$  values). In  
162 contrast, for whole brain volume we observed a slight, but significant, decrease in whole brain  
163 volume with time in the L1 (Supplementary Figure 3D, Supplementary Table 1). In this case, the  
164 linear model explained only 4% of the variance in whole brain volume in the L1 (Supplementary  
165 Table 1, adjusted  $R^2$  values). There was no significant change in brain volume with time across  
166 the L2 stage (Supplementary Figure 3E, Supplementary Table 1). In the L3, whole brain volume  
167 shows a non-linear relationship with time, curving upwards. This suggests that whole brain  
168 growth speeds up as the third instar progresses (Supplementary Figure 3F). Curiously, at 0

169 hours after the moult to both L2 and L3, brain volume appears to increase despite no evidence  
170 of positive growth during the L1 or L2 instars. We cannot tell whether this is a random sampling  
171 effect or if this results from a burst of growth during the moult cycle itself, which we could not  
172 accurately sample.

173 Our results thus far suggest that whole brain growth is regulated differently to that of the  
174 larval body and mushroom bodies. To formally test this, we fit our growth data with both linear  
175 models and a range of non-linear models commonly used to describe growth dynamics,  
176 including second order polynomial, exponential, lagged exponential, and power models  
177 (Karkach, 2006). Each of these models infers something different about growth. The second  
178 order polynomial model assumes that the organ will have periods where its growth increases  
179 steadily with time, as well as periods during which growth rates slow down; exponential models  
180 describe growth that speeds up exponentially over time; lagged exponential models are similar  
181 to exponential models, but infer a period of slow or no growth followed by a switch to  
182 exponential growth; and the power model implies that growth increases according to a power  
183 function. We assessed which model best fit our growth data for each trait using two different  
184 model selection methods: Akaike's Information Criteria (AIC) and Bayesian Information Criteria  
185 (BIC), both of which estimate the quality of each model relative to the others, penalizing  
186 models with a higher number of parameters to avoid overfitting the data. The model with the  
187 lowest AIC and BIC values provides the best fit for the data. Where these values were close  
188 between models, we selected the simplest model (i.e. the model with the fewest parameters).  
189 We restricted these comparisons to L3 growth, since the whole brains did not show significant  
190 positive growth in the L1 and L2 stages.

191 For growth in the larval body and mushroom body, we found that linear models provided  
192 the best fit to our data (Supplementary Table 2). This means that the growth rates in the larval  
193 body and mushroom body do not change over time in the third instar. Whole brain growth, on  
194 the other hand, was best fit with a lagged exponential model. This indicates that in the early  
195 stages of the third instar the whole brain grew very slowly. After this initial lag phase, the rate  
196 of whole brain growth increased exponentially. Taken together, these data suggest that while  
197 the larval body and mushroom body growth rates do not change with time over the third instar,  
198 the whole brain undergoes a period of little growth, followed by a second phase of rapidly  
199 increased growth in the L3.

## 200 **Developmental time and growth dynamics are modulated by changes in nutrition and** 201 **temperature**

202 We next sought to determine how brain size remains robust when developmental time  
203 becomes extended as a result of altered environmental conditions. To do so, we first  
204 determined the diet and temperature conditions that produced the most differences in brain  
205 growth. We reared larvae on 5 different diets of 10%, 12.5%, 25%, 50%, and 100% and three  
206 temperatures 18°C, 25°C, or 29°C. Our preliminary data showed that we could achieve the  
207 greatest range of effects by comparing the 10%, 25% and 100% diets and 25°C and 29°C rearing  
208 temperatures (Supplementary Figure 4). We compared growth rates in the L3 across these six  
209 environmental conditions. Changing the diet and/or rearing temperature altered the time it  
210 took for animals to initiate metamorphosis at pupariation (white pre-pupae). Compared to



211 animals grown under standard conditions (25°C and 100% food), animals reared on food with  
212 only 10% of the normal caloric content took the longest to pupariate (90 and 80 hours after the  
213 moult at 25°C and 29°C respectively, compared to 42 hours at 25°C on 100% food). At 25°C,  
214 pupariation was delayed to 50 hours after the moult when larvae were reared on 25% food.  
215 Development time was similar between the 25% and 100% food conditions at 29°C (42 hours  
216 from moult to white pre-pupae).

217 Given these differences in development time across nutritional and thermal conditions, we  
218 next defined how this changed growth dynamics of the mushroom body, whole brain, and  
219 larval body. For each condition, we sampled 5-7 time points across the L3 stage, with the last 2  
220 time points corresponding to the wandering and white prepupal stages, respectively. Diluting  
221 the food reduced growth rates of the larval body at both temperatures (Figure 2A, B,  
222 Supplementary Table 3). Overall, the larval body grew more slowly when larvae were reared at  
223 29°C compared to 25°C (Figure 2A, B, Supplementary Table 3). Larvae grew slowest on 10%  
224 food at 29°C and fastest on 100% food at 25°C (Figure 2A, B, Supplementary Table 3), resulting  
225 in a significant interaction between time, food, and temperature. These data provide a  
226 convenient proof-of-principle that we can alter growth dynamics by manipulating food and  
227 temperature.

228 Changing developmental time allowed us to directly test our different models. We  
229 predicted that brain structures would remain robust to changes in developmental time in one  
230 of three ways (Figure 1A). Our first model predicted that when developmental time was  
231 extended, brain structures would maintain their growth rates, grow to their final size, and then  
232 stop growing and remain the same size until pupariation. This would be modelled best using an  
233 asymptotic regression, but could also be approximated by a negative quadratic term from a  
234 second order polynomial regression – indicating growth rates are slowing down. In our second  
235 model, we predicted that brain structures would remain robust against changes in  
236 developmental time by altering the time at which growth is initiated, but maintaining constant  
237 growth rates. This hypothesis would be best supported by a change in the lag constant of a  
238 lagged exponential regression. Our final hypothesis proposed that brain structures would  
239 carefully tune both their rates of growth and the time they initiated exponential growth,  
240 supported by a change in both the scaling and lag constants of a lagged exponential regression  
241 or by a change in slope in a linear regression in the case of the mushroom bodies.

242 In the mushroom body, we found that diluting the food reduced growth rates (Figure 2E, F,  
243 Supplementary Table 3), but that rearing temperature did not affect the rate of growth in this  
244 structure. This resulted in a significant decrease in growth rates for larvae grown on 10% food  
245 when compared to 25% food, as well as reduced growth rates on 25% food when compared to  
246 100% food at both temperatures. Under all conditions, the mushroom bodies maintained linear  
247 growth trajectories. This best supports our model that at least the mushroom body  
248 compartment of the brain achieves robustness of size by carefully tuning its growth rates to  
249 adjust for changes in developmental time.

250 Because the whole brain showed non-linear growth patterns, we initially modelled whole  
251 brain growth using second order polynomials (Figure 2C, D, Supplementary Table 2). Similar to  
252 the larval body and mushroom bodies, diluting the food reduced the growth rates of the whole  
253 brain with the slowest growth on 10% food for both temperatures. Rearing temperature also

254 reduced growth rates in the whole brain (Figure 2C, D, Supplementary Table 3), and the way  
255 that food affected growth rates depended on the rearing temperature. For larvae reared at  
256 25°C, growth rates differed depending on whether they were given 25% or 100% food. At 29°C,  
257 there was no difference in growth rate between the 25% and 100% food. Thus, the whole brain  
258 shows complex responses to the combined effects of temperature and diet.

259 These models allowed us to further distinguish between our hypotheses. If whole brains  
260 grew to a target size and then stopped, we would expect the quadratic terms from our  
261 polynomial regressions to be negative as growth rates decreased. In all cases where the  
262 quadratic term was significant in our models, we found that the value was positive (Table 1).  
263 This suggests that our first model – that brains should grow to a target size then stop – is not  
264 supported by our data.

265 We can distinguish between our second and third models using the lagged exponential  
266 growth models using the formula  $\ln(\text{whole brain}) = a + e^{\frac{\text{Time}-b}{c}}$ , where a is the intercept, b  
267 is the lag constant, and c is the scaling constant. If brains remain robust to changes in  
268 developmental time by altering the time at which they turn on growth (hypothesis 2, Figure 1),  
269 we would expect the lag constant (b) to change, but not the scaling constant (c). Hypothesis 3  
270 would be supported if both the lag constant (b) and scaling constant (c) changed with altered  
271 developmental time (Figure 1).

272 We fit our whole brain growth data with lagged exponential curves and explored whether  
273 the lag and scaling constants differed across our six environmental conditions (Table 2). We  
274 then conducted pairwise comparisons between whole brain growth curves either at the same  
275 temperature but across different diets, or on the same diet but across the two temperatures.  
276 We asked whether fitting specific lag and scaling constants for the curves for each condition  
277 improved the fit to the data. For the comparisons between the 10% food and either the 25% or  
278 the 100% food, the lag constants were too dissimilar to find a common coefficient, resulting in a  
279 failure to resolve a null model. While this suggests that the lag constants differ in these  
280 comparisons, we cannot formally test for this. However, both the lag constants (1 instance) and  
281 the scaling constants (5 instances) differed significantly between conditions for whole brain  
282 growth (Table 2). Taken together, our data best supports a model where both the timing at  
283 which exponential growth begins and the growth rate are carefully tuned to adjust for  
284 differences in developmental time.

## 285 **Changing environmental conditions affects size traits in the prepupae**

286 We have shown that the growth dynamics of the larval body, mushroom body, and whole  
287 brain are all sensitive to environmental perturbation, but that they respond in different ways to  
288 changes in diet and temperature. We next extended these findings by examining the effects of  
289 changed environmental conditions on their final size at pupariation.

290 Pupal body volume decreased as the food was diluted and also decreased at the higher  
291 temperature (Figure 3A, Table 3). This is what we would have expected given previously  
292 published data on the effects of diet and temperature on pupal body size (Courret et al., 2014;  
293 Davidowitz et al., 2003; Loeb & Northrop, 1917). At pupariation, we did not observe a  
294 significant effect of diet on its own for whole brain volume (Figure 3B, Table 3). However, whole

295 brains were smaller at 29°C than at 25°C, and there was a significant temperature by diet  
296 interaction (Figure 3B, Table 3). This is due to the fact that at 25°C larval diet had no effect on  
297 brain volume while at 29°C, brain volume decreased with diet concentration. Mushroom body  
298 volumes at pupariation varied with diet and temperature, with increasing food concentrations  
299 and increasing temperatures negatively impacting mushroom body volume (Figure 3C, Table 3).  
300 The significant interaction between diet and temperature results from the fact that while food  
301 concentration correlates negatively with mushroom body volume at 25°C, it correlates  
302 positively with mushroom body volume at 29°C.

303 These differences in the way the whole brain and mushroom body volumes respond to diet  
304 and temperature has interesting implications for brain shape. While mushroom body volumes  
305 are remarkably robust in size on 25% and 100% foods, on 10% food they are larger for their  
306 brain size at 25°C and smaller for their whole brain size at 29°C (Figure 3D, Table 3). This  
307 highlights that brain shape changed across environmental conditions, as compartments of the  
308 brain differed in how they grew in response to these conditions.

## 309 Discussion

310 Individual organs vary in their response to the environmental conditions that affect adult  
311 body size (Shingleton et al., 2009). Organs like the brain and genital discs are known to be  
312 nutritionally insensitive when compared to organs like the wing (Chell & Brand, 2010; Cheng et  
313 al., 2011; Shingleton, 2010; Shingleton & Frankino, 2018; Tang et al., 2011). While we have  
314 some understanding of the genetic mechanisms underpinning robustness in size in these  
315 organs, our understanding of how these mechanisms affect the dynamics of growth was poorly  
316 understood. Further, the brain is a complex organ whose compartments do not all behave in  
317 the same manner. Functional compartments like the *Drosophila* mushroom body differ in their  
318 growth patterns as well as their nutritional plasticity from the rest of the brain. In this study, we  
319 aimed to test our predictions that the differences in proliferation between neurons of the  
320 whole brain and mushroom bodies would confer distinct growth dynamics, which could impart  
321 differences in their sensitivity to environmental conditions.

322 Previous studies had suggested that brain sparing occurs under stressful conditions because  
323 Jeb/Alk maintain high levels of insulin and TOR signalling in the neuroblasts (Cheng et al., 2011).  
324 These same conditions act to extend development time of the larva (Beadle et al., 1938;  
325 Nunney & Cheung, 1997; Partridge et al., 1994; Robertson, 1962, 1966; Robertson & Reeve,  
326 1952). If insulin and TOR levels are at the same level in the brains of starved and fed larvae,  
327 then the brain must have additional mechanisms to prevent overgrowth when development  
328 time is extended. In this study, we altered development time by changing both nutrition and  
329 temperature. We proposed three hypotheses that would allow brain size to remain robust  
330 against environmental conditions. These posited that in response to changes in total  
331 development time the brain would either 1) grow to a target size and stop growing for the  
332 remainder of the growth period, 2) delay the onset of its growth, but maintain constant growth  
333 rates even under stressful conditions, or 3) regulate both its growth rate and the time at which  
334 it switches growth on to adjust for changes in developmental time. Our data supports our third  
335 hypothesis, that robustness of brain size is possible because both the time at which exponential  
336 growth is initiated and the rates of growth of the brain have been altered.



337 Our results imply that Jeb/Alk signalling, which is responsible for brain sparing in *Drosophila*,  
338 plays a more nuanced role than previously described. Rather than simply maintaining high  
339 levels of insulin and/or TOR signalling, signalling from Alk could be acting to adjust growth rates  
340 of the brain to match changes in developmental time. Precisely how this occurs is unknown,  
341 however given that both insulin and ecdysone signalling are key regulators of the length of the  
342 growth period (Caldwell et al., 2005; Colombani et al., 2005; Koyama et al., 2014; Mirth et al.,  
343 2005; Shingleton et al., 2005), these systemic cues could be regulating the concentration of Jeb  
344 secreted by the glial cells in accordance with the degree to which development is delayed.  
345 Other organs that show robustness in final size could be responding to environmental  
346 conditions in a similar fashion. For example, we would predict the genital discs maintain robust  
347 final size by tuning their growth rates to account for extended growth periods under poor  
348 nutrition or thermal stress.

349 While the size of the pupal brain is robust against environmental conditions, this does not  
350 mean that brain growth is insensitive to environmental stress. Nutritional signals are important  
351 for neuroblasts to exit quiescence and re-initiate proliferation in the larval stages (Britton &  
352 Edgar, 1998; Chell & Brand, 2010; Yuan et al., 2020). Cues from the fat body, the insect  
353 equivalent of the adipose tissue and liver, signal to glial cells in the brain, which in turn produce  
354 insulin-like peptides that induce the neuroblasts to recommence cell divisions (Britton & Edgar,  
355 1998; Chell & Brand, 2010; Yuan et al., 2020). Starving larvae in early instars causes most  
356 neuroblasts and glia, with the exception of the mushroom body neuroblasts, to remain  
357 quiescent (Britton & Edgar, 1998; Chell & Brand, 2010; Yuan et al., 2020). This is owing to the  
358 cell-autonomous and non-autonomous growth coordination activity of PI3Kinase in the early  
359 larval stages of development (Yuan et al., 2020). After they exit quiescence, neuroblasts no  
360 longer depend on nutritional cues to maintain proliferation (Cheng et al., 2011; Lanet &  
361 Maurange, 2014). However, our data demonstrates that rates of brain growth remain sensitive  
362 to environmental cues. Whether this is due to changes in rates of neuroblast proliferation, or  
363 changes in the rates of increase in cell size within the brain is yet unclear.

364 Although the growth dynamics of the whole brain change to accommodate additional  
365 developmental time, our findings also demonstrate that not all compartments of the brain  
366 should be expected to respond in the same way. Our comparisons between whole brain and  
367 the mushroom bodies highlight how the growth dynamics of specific brain compartments can  
368 differ from the patterns observed across the brain as a whole. Some of these differences arise  
369 simply due to differences in the timing of neuroblast reactivation. While the neurons of the  
370 mushroom body continue to proliferate throughout larval development, most other  
371 neuroblasts reinitiate proliferation after the late second instar. This alone should be sufficient  
372 to generate differences in growth dynamics between the mushroom bodies and the rest of the  
373 brain, however the role of increases in cell size across brain regions has yet to be explored.

374 Furthermore, differences in growth patterns are not unique to the mushroom body. Unlike  
375 most of the other regions of the brain, the optic lobe shows extensive plasticity in size with  
376 nutritional conditions (Lanet et al., 2013; Lanet & Maurange, 2014). This is presumably to  
377 compensate for changes in eye size across environmental conditions, and is facilitated by their  
378 unique mode of development. Instead of arising from embryonic neuroblasts, the optic lobe is  
379 formed from neuroepithelium that continues to divide and expand until early in the third instar

380 (Brand & Livesey, 2011; Farkas & Huttner, 2008). Proliferation of the optic lobe  
381 neuroepithelium remains sensitive to nutrition until the early third instar, where a small pulse  
382 of ecdysone induces the cells in this neuroepithelium to become neuroblasts (Lanet et al.,  
383 2013). After this transition, starvation no longer impacts cell divisions in this brain region, and  
384 each neuroblast proceeds to divide and generate the full complement of neuronal cells types  
385 necessary for the function of the optic lobe (Lanet et al., 2013). This ensures that while the total  
386 number of neurons in the optic lobe is plastic, the diversity of cell types is held constant (Lanet  
387 et al., 2013). Given its mode of development and persistent sensitivity to nutrition, we would  
388 expect that the optic lobes would also exhibit different growth dynamics from the whole brain.

389 Given these differences in growth patterns across the mushroom body and whole brain, we  
390 would predict that the compartments of the brain might differ in their sensitivity to the two  
391 pathways known to regulate growth in response to nutrition: the insulin and TOR pathways  
392 (Yuan et al., 2020). Other studies of whole brain growth in *Drosophila* (Sousa-Nunes et al.,  
393 2010; Yuan et al., 2020), and in mammals (Cloetta et al., 2013), show TOR signalling controls cell  
394 cycle progression and neuronal exit from quiescence respectively, ultimately regulating final  
395 brain size. In the mushroom body, the Pax-6 orthologue, Eyeless, allows mushroom body  
396 neuroblasts to continue proliferating independent of PI3Kinase activity, a central regulator of  
397 insulin signalling, under conditions of poor nutrition (Sipe & Siegrist, 2017). This is likely to be a  
398 matter of degree: while eyeless undoubtedly plays a role in maintaining proliferation, insulin  
399 signalling in the mushroom body neuroblasts has its own independent effects on proliferation  
400 and in controlling the size of the arbour (Sipe & Siegrist, 2017).

401 Finally, the majority of studies of brain growth have focused on nutritional stress. However,  
402 a number of other conditions are known to extend developmental time, including temperature,  
403 oxygen limitation, and larval density (Mirth & Shingleton, 2012; Partridge et al., 1994; Peck &  
404 Maddrell, 2005). The mechanisms regulating extended developmental time under these  
405 conditions are less well understood, but ultimately culminate in changing the rate of ecdysone  
406 production and secretion. Previous studies have documented that reducing or eliminating  
407 ecdysone or ecdysone signalling also reduces brain size (Herboso et al., 2015; Lanet et al.,  
408 2013). Thus, in addition to insulin and TOR pathways, ecdysone is likely to regulate the size of  
409 whole brains and the size of its compartments by fixing the length of their growth period.

## 410 **Conclusion**

411 In this research, we sought to understand how organs achieve robust final size by exploring  
412 the growth dynamics of the brain across nutritional and thermal conditions. We found that at  
413 least one compartment of the brain can differ in its growth patterns from the rest of the brain,  
414 and speculate that this might be true of other compartments. These distinct growth patterns  
415 allow specific brain regions to vary their response to changing environmental conditions. Taken  
416 together, our findings demonstrate that brain compartments achieve robustness in final size via  
417 different trajectories. Furthermore, by probing the growth dynamics of organs under  
418 environmental stress, we fill in important gaps in our knowledge of how these organs achieve  
419 robustness of final size.

## 420 421 **Acknowledgements**

422 We are grateful to Keith Schulze, Alex Fulcher and Stephen Firth of the Monash MicroImaging  
423 (MMI) for their technical support and members of the Mirth lab for their helpful discussion on  
424 the project. This work was supported by an Australian Research Council Future Fellowship  
425 (FT170100259) to CKM and the School of Biological Sciences, Monash University, Australia.

426

427 **Author contributions**

428 AEC, BN and CKM conceived and designed the experiments. AEC performed the experiments.  
429 AEC and CKM analysed the data. All authors contributed to interpretation of data and final  
430 manuscript preparation.

431

432 **Declaration of interests**

433 The authors declare no competing interests.

434

435

436 **REFERENCES**

- 437 Andersen, Colombani, & Leopold. (2013). Coordination of organ growth: principles and  
438 outstanding questions from the world of insects. *Trends Cell Biol*, 23(7), 336-344.  
439
- 440 Bateson. (2017). Robustness and plasticity in development. *Wiley Interdiscip Rev Cogn Sci*, 8(1-  
441 2).  
442
- 443 Baty, Ritz, Charles, Brutsche, Flandrois, & Delignette-Muller. (2015). A Toolbox for Nonlinear  
444 Regression in R: The Packagenlstoools. *Journal of Statistical Software*, 66(5).  
445
- 446 Beadle, Tatum, & Clancy. (1938). Food Level in Relation to Rate of Development and Eye  
447 Pigmentation in *Drosophila Melanogaster*. *The Biological Bulletin*, 75(3), 447-462.  
448
- 449 Brand, & Livesey. (2011). Neural stem cell biology in vertebrates and invertebrates: more alike  
450 than different? *Neuron*, 70(4), 719-729.  
451
- 452 Britton, & Edgar. (1998). Environmental control of the cell cycle in *Drosophila*: nutrition  
453 activates mitotic and endoreplicative cells by distinct mechanisms. *Development*,  
454 125(11), 2149-2158.  
455
- 456 Caldwell, Walkiewicz, & Stern. (2005). Ras activity in the *Drosophila* prothoracic gland regulates  
457 body size and developmental rate via ecdysone release. *Curr Biol*, 15(20), 1785-1795.  
458
- 459 Chell, & Brand. (2010). Nutrition-responsive glia control exit of neural stem cells from  
460 quiescence. *Cell*, 143(7), 1161-1173.  
461
- 462 Cheng, Bailey, Leever, Ragan, Driscoll, & Gould. (2011). Anaplastic lymphoma kinase spares  
463 organ growth during nutrient restriction in *Drosophila*. *Cell*, 146(3), 435-447.  
464
- 465 Cloetta, Thomanetz, Baranek, Lustenberger, Lin, Oliveri, Atanasoski, & Rugg. (2013).  
466 Inactivation of mTORC1 in the developing brain causes microcephaly and affects  
467 gliogenesis. *J Neurosci*, 33(18), 7799-7810.  
468
- 469 Cohen, Baerts, & van Bel. (2015). Brain-Sparing in Intrauterine Growth Restriction:  
470 Considerations for the Neonatologist. *Neonatology*, 108(4), 269-276.  
471
- 472 Colombani, Bianchini, Layalle, Pondeville, Dauphin-Villemant, Antoniewski, Carre, Noselli, &  
473 Leopold. (2005). Antagonistic actions of ecdysone and insulins determine final size in  
474 *Drosophila*. *Science*, 310(5748), 667-670.  
475
- 476 Couret, Dotson, & Benedict. (2014). Temperature, larval diet, and density effects on  
477 development rate and survival of *Aedes aegypti* (Diptera: Culicidae). *PLoS One*, 9(2),  
478 e87468.  
479

- 480 Cox, & Marton. (2009). Pathological assessment of intrauterine growth restriction. *Best Pract*  
481 *Res Clin Obstet Gynaecol*, 23(6), 751-764.  
482
- 483 Cusick, & Georgieff. (2016). The Role of Nutrition in Brain Development: The Golden  
484 Opportunity of the "First 1000 Days". *J Pediatr*, 175, 16-21.  
485
- 486 Daul, Komori, & Lee. (2010). Immunofluorescent staining of Drosophila larval brain tissue. *Cold*  
487 *Spring Harb Protoc*, 2010(7), pdb prot5460.  
488
- 489 Davidowitz, D'Amico, & Nijhout. (2003). Critical weight in the development of insect body size.  
490 *Evol Dev*, 5(2), 188-197.  
491
- 492 Eder, Aegerter, & Basler. (2017). Forces controlling organ growth and size. *Mech Dev*, 144(Pt A),  
493 53-61.  
494
- 495 Farkas, & Huttner. (2008). The cell biology of neural stem and progenitor cells and its  
496 significance for their proliferation versus differentiation during mammalian brain  
497 development. *Curr Opin Cell Biol*, 20(6), 707-715.  
498
- 499 Hafer, & Schedl. (2006). Dissection of larval CNS in Drosophila melanogaster. *J Vis Exp*(1), 85.  
500
- 501 Hartenstein, Cardona, Pereanu, & Younossi-Hartenstein. (2008). Modeling the Developing  
502 Drosophila Brain: Rationale, Technique, and Application. *BioScience*, 58(9), 823-836.  
503
- 504 Hartenstein, Spindler, Pereanu, & Fung. (2008). The development of the Drosophila larval brain.  
505 *Adv Exp Med Biol*, 628, 1-31.  
506
- 507 Hartenstein, Technau, & Campos-Ortega. (1985). Fate-mapping in wild-type Drosophila  
508 melanogaster. *Wilhelm Roux's Archives of Developmental Biology*, 194(4), 213-216.  
509
- 510 Hartenstein, & Wodarz. (2013). Initial neurogenesis in Drosophila. *Wiley Interdiscip Rev Dev*  
511 *Biol*, 2(5), 701-721.  
512
- 513 Heisenberg, Heusipp, & Wanke. (1995). Structural plasticity in the Drosophila brain. *J Neurosci*,  
514 15(3 Pt 1), 1951-1960.  
515
- 516 Herboso, Oliveira, Talamillo, Perez, Gonzalez, Martin, Sutherland, Shingleton, Mirth, & Barrio.  
517 (2015). Ecdysone promotes growth of imaginal discs through the regulation of Thor in D.  
518 melanogaster. *Sci Rep*, 5, 12383.  
519
- 520 Huxley. (1932). Problems of Relative Growth. *Nature*, 129(3265), 775-777.  
521
- 522 Jenett, Rubin, Ngo, Shepherd, Murphy, Dionne, Pfeiffer, Cavallaro, Hall, Jeter, Iyer, Fetter,  
523 Hausenfluck, Peng, Trautman, Svirskas, Myers, Iwinski, Aso, DePasquale, Enos, Hulamm,



- 524 Lam, Li, Lavery, Long, Qu, Murphy, Rokicki, Safford, Shaw, Simpson, Sowell, Tae, Yu, &  
525 Zugates. (2012). A GAL4-driver line resource for *Drosophila* neurobiology. *Cell Rep*, 2(4),  
526 991-1001.  
527
- 528 Karkach. (2006). Trajectories and models of individual growth. *Demographic Research*, 15, 347-  
529 400.  
530
- 531 Koyama, Rodrigues, Athanasiadis, Shingleton, & Mirth. (2014). Nutritional control of body size  
532 through FoxO-Ultraspiracle mediated ecdysone biosynthesis. *Elife*, 3.  
533
- 534 Kunz, Kraft, Technau, & Urbach. (2012). Origin of *Drosophila* mushroom body neuroblasts and  
535 generation of divergent embryonic lineages. *Development*, 139(14), 2510-2522.  
536
- 537 Lanet, Gould, & Maurange. (2013). Protection of neuronal diversity at the expense of neuronal  
538 numbers during nutrient restriction in the *Drosophila* visual system. *Cell Rep*, 3(3), 587-  
539 594.  
540
- 541 Lanet, & Maurange. (2014). Building a brain under nutritional restriction: insights on sparing  
542 and plasticity from *Drosophila* studies. *Front Physiol*, 5, 117.  
543
- 544 Lin, Marin, Yang, Kao, Apenteng, Huang, O'Connor, Truman, & Lee. (2013). Extremes of lineage  
545 plasticity in the *Drosophila* brain. *Curr Biol*, 23(19), 1908-1913.  
546
- 547 Loeb, & Northrop. (1917). On the influence of food and temperature upon the duration of life.  
548 *Journal of Biological Chemistry*.  
549
- 550 McDonald, Ghosh, Gascoigne, & Shingleton. (2018). Plasticity Through Canalization: The  
551 Contrasting Effect of Temperature on Trait Size and Growth in *Drosophila*. *Front Cell Dev*  
552 *Biol*, 6, 156.  
553
- 554 Miner, Rosenberg, & Frederik Nijhout. (2000). Control of growth and differentiation of the wing  
555 imaginal disk of *Precis coenia* (Lepidoptera: Nymphalidae). *Journal of Insect Physiology*,  
556 46(3), 251-258.  
557
- 558 Mirth, & Shingleton. (2012). Integrating body and organ size in *Drosophila*: recent advances and  
559 outstanding problems. *Front Endocrinol (Lausanne)*, 3, 49.  
560
- 561 Mirth, & Shingleton. (2012). Integrating body and organ size in *Drosophila*: recent advances and  
562 outstanding problems. *Front Endocrinol (Lausanne)*, 3, 49.  
563
- 564 Mirth, & Shingleton. (2019). Coordinating Development: How Do Animals Integrate Plastic and  
565 Robust Developmental Processes? *Front Cell Dev Biol*, 7, 8.  
566

- 567 Mirth, Truman, & Riddiford. (2005). The role of the prothoracic gland in determining critical  
568 weight for metamorphosis in *Drosophila melanogaster*. *Curr Biol*, 15(20), 1796-1807.  
569
- 570 Nijhout. (2002). The nature of robustness in development. *Bioessays*, 24(6), 553-563.  
571
- 572 Nijhout, & Grunert. (2010). The cellular and physiological mechanism of wing-body scaling in  
573 *Manduca sexta*. *Science*, 330(6011), 1693-1695.  
574
- 575 Nijhout, Riddiford, Mirth, Shingleton, Suzuki, & Callier. (2014). The developmental control of  
576 size in insects. *Wiley Interdiscip Rev Dev Biol*, 3(1), 113-134.  
577
- 578 Nunney, & Cheung. (1997). The Effect of Temperature on Body Size and Fecundity in Female  
579 *Drosophila Melanogaster*: Evidence for Adaptive Plasticity. *Evolution*, 51(5), 1529-1535.  
580
- 581 Partridge, Barrie, Fowler, & French. (1994). Evolution and Development of Body Size and Cell  
582 Size in *Drosophila Melanogaster* in Response to Temperature. *Evolution*, 48(4), 1269-  
583 1276.  
584
- 585 Peck, & Maddrell. (2005). Limitation of size by hypoxia in the fruit fly *Drosophila melanogaster*.  
586 *J Exp Zool A Comp Exp Biol*, 303(11), 968-975.  
587
- 588 Pfeiffer, Jenett, Hammonds, Ngo, Misra, Murphy, Scully, Carlson, Wan, Lavery, Mungall,  
589 Svirskas, Kadonaga, Doe, Eisen, Celniker, & Rubin. (2008). Tools for neuroanatomy and  
590 neurogenetics in *Drosophila*. *Proc Natl Acad Sci U S A*, 105(28), 9715-9720.  
591
- 592 Poe, Xu, Zhang, Lei, Li, Labib, & Han. (2020). Low FoxO expression in *Drosophila* somatosensory  
593 neurons protects dendrite growth under nutrient restriction. *Elife*, 9.  
594
- 595 Prokop, & Technau. (1991). The origin of postembryonic neuroblasts in the ventral nerve cord  
596 of *Drosophila melanogaster*. *Development*, 111(1), 79-88.  
597
- 598 Prokop, & Technau. (1994). Normal function of the mushroom body defect gene of *Drosophila*  
599 is required for the regulation of the number and proliferation of neuroblasts. *Dev Biol*,  
600 161(2), 321-337.  
601
- 602 Robertson. (1962). Genetic variation in the nutrition of *Drosophila melanogaster*--some general  
603 inferences. *Proc Nutr Soc*, 21, 169-178.  
604
- 605 Robertson. (1966). The ecological genetics of growth in *Drosophila*. 8. Adaptation to a new diet.  
606 *Genet Res*, 8(2), 165-179.  
607
- 608 Robertson, & Reeve. (1952). Heterozygosity, environmental variation and heterosis. *Nature*,  
609 170(4320), 286.  
610

- 611 Rossi, Fernandes, & Desplan. (2017). Timing temporal transitions during brain development.  
612 *Curr Opin Neurobiol*, 42, 84-92.  
613
- 614 Shingleton. (2010). The regulation of organ size in *Drosophila*: physiology, plasticity, patterning  
615 and physical force. *Organogenesis*, 6(2), 76-87.  
616
- 617 Shingleton, Das, Vinicius, & Stern. (2005). The temporal requirements for insulin signaling  
618 during development in *Drosophila*. *PLoS Biol*, 3(9), e289.  
619
- 620 Shingleton, Estep, Driscoll, & Dworkin. (2009). Many ways to be small: different environmental  
621 regulators of size generate distinct scaling relationships in *Drosophila melanogaster*.  
622 *Proc Biol Sci*, 276(1667), 2625-2633.  
623
- 624 Shingleton, & Frankino. (2018). The (ongoing) problem of relative growth. *Curr Opin Insect Sci*,  
625 25, 9-19.  
626
- 627 Shingleton, Mirth, & Bates. (2008). Developmental model of static allometry in holometabolous  
628 insects. *Proc Biol Sci*, 275(1645), 1875-1885.  
629
- 630 Sipe, & Siegrist. (2017). Eyeless uncouples mushroom body neuroblast proliferation from  
631 dietary amino acids in *Drosophila*. *Elife*, 6.  
632
- 633 Sousa-Nunes, Cheng, & Gould. (2010). Regulating neural proliferation in the *Drosophila* CNS.  
634 *Curr Opin Neurobiol*, 20(1), 50-57.  
635
- 636 Speder, & Brand. (2018). Systemic and local cues drive neural stem cell niche remodelling  
637 during neurogenesis in *Drosophila*. *Elife*, 7.  
638
- 639 Tang, Smith-Caldas, Driscoll, Salhadar, & Shingleton. (2011). FOXO regulates organ-specific  
640 phenotypic plasticity in *Drosophila*. *PLoS Genet*, 7(11), e1002373.  
641
- 642 Toivonen, Walker, Martinez-Diaz, Bjedov, Driegen, Jacobs, Gems, & Partridge. (2007). No  
643 influence of Indy on lifespan in *Drosophila* after correction for genetic and cytoplasmic  
644 background effects. *PLoS Genet*, 3(6), e95.  
645
- 646 Truman, & Bate. (1988). Spatial and temporal patterns of neurogenesis in the central nervous  
647 system of *Drosophila melanogaster*. *Dev Biol*, 125(1), 145-157.  
648
- 649 Wang, Amei, de Belle, & Roberts. (2018). Environmental effects on *Drosophila* brain  
650 development and learning. *J Exp Biol*, 221(Pt 1).  
651
- 652 Wickham. (2016). ggplot2: Elegant Graphics for Data Analysis. *Springer-Verlag New York*. .  
653

654 Yuan, Sipe, Suzawa, Bland, & Siegrist. (2020). Dilp-2-mediated PI3-kinase activation coordinates  
655 reactivation of quiescent neuroblasts with growth of their glial stem cell niche. *PLoS*  
656 *Biol*, 18(5), e3000721.  
657  
658

1 **Figures**

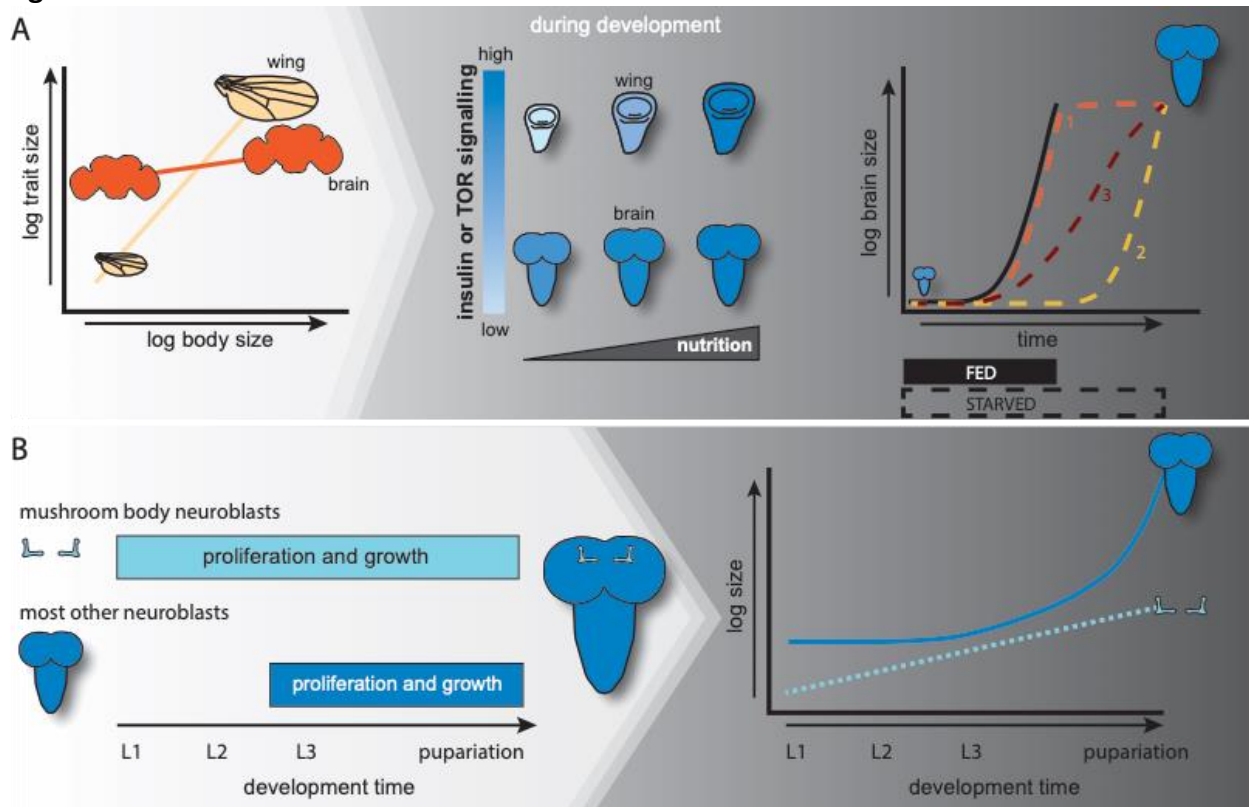

2  
3

**Figure 1: How do the growth dynamics of the whole brain and the mushroom bodies vary.** (A) Hypothesis 1: Mushroom bodies proliferate throughout larval development, while most of other neuroblasts in the brain remain quiescent and reinitiate proliferation in the late second instar (L2). These differences in proliferation could result in differences in the dynamics of mushroom body growth when compared to the whole brain. While we expect that the whole brain would show a lag period where it does not grow, followed by a period of exponential growth, the mushroom body might show constant (linear) increases in size across the larval stages of development (dashed line 1). Alternatively, the mushroom body might show similar growth dynamics, with shallower increase in growth rate in later development (dashed line 2). Differences in growth dynamics between the mushroom bodies and the whole brain would suggest that they are regulated in distinct manners under changing environmental conditions. (B) In comparison to other organs like the wing, adult brain size changes little with changes in body size. The reason that this is thought to occur is that insulin and target of rapamycin (TOR) signalling is kept high in the brain even under poor nutrient conditions via the action of *Jeb/Alk*. High levels of insulin or TOR signalling would suggest that brains would maintain constant growth rates even across environmental conditions – like starvation – that induce prolonged larval development. To maintain constant size, this would mean that the brain would either need to grow at constant rates until it reached its target size and then stop (orange dashed line 1), or else delay the onset of growth until later (yellow dashed line 2). Alternatively, *Jeb/Alk* could tune insulin or TOR signalling levels such that the rate of growth was reduced to compensate for the extended development time (red dashed line 3).



4

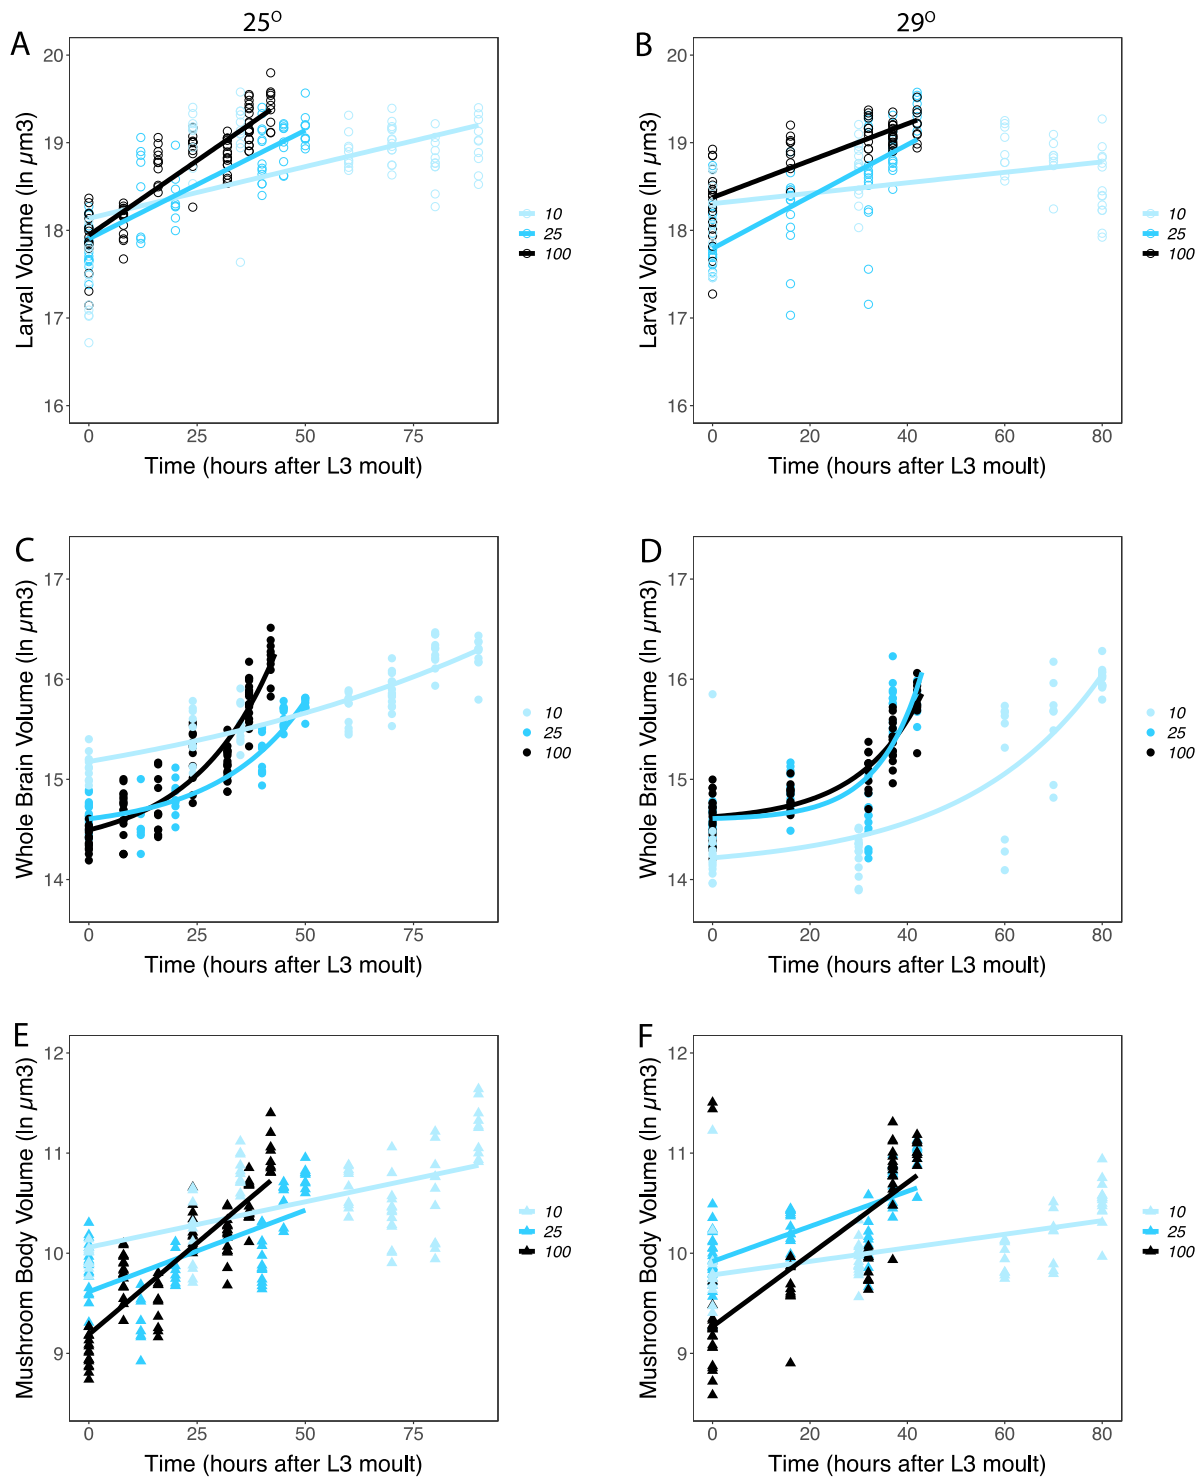

5

**Figure 2: Growth rates** of the larval body (A, B), whole brain (C, D), and mushroom bodies (E, F) over time from the moult prior to third instar through pupariation under different dietary and thermal conditions. Panels (A), (C) and (E) show three dietary conditions (10%, 25%, and 100% food) at 25°C. Panels (B), (D) and (F) show the three dietary conditions (10%, 25%, and 100% food) at 29°C.

6

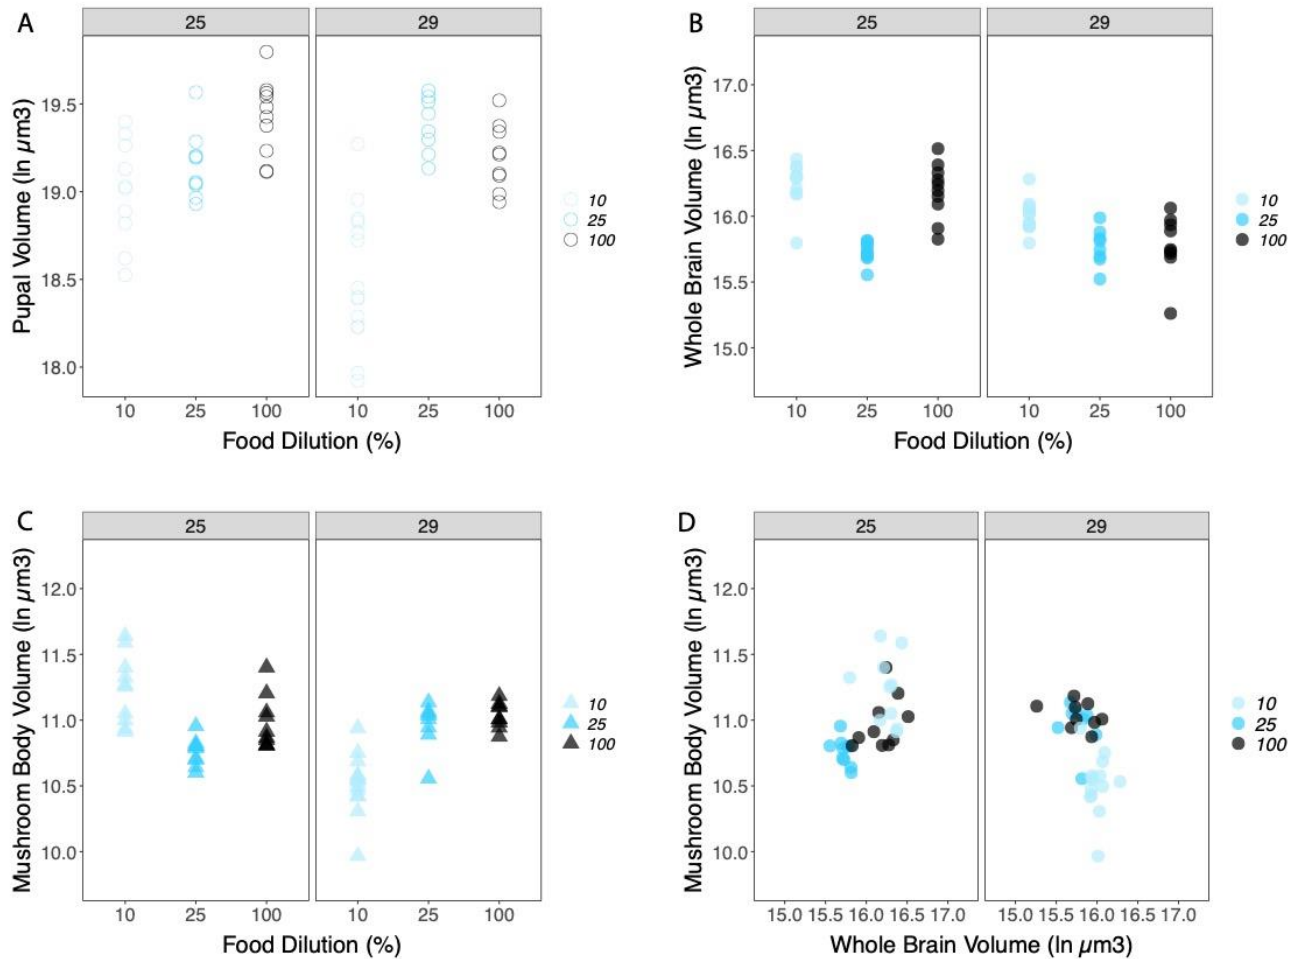

7  
8

**Figure 3: The prepupal volume of (A), whole brain volume (B) and the mushroom body volume (C) across nutritional (10%, 25% and 100%) and thermal conditions (25°C and 29°C). The relationship between whole brain and mushroom body volume is shown in (D).**

9 **Tables**

10 Table 1: Model to test hypothesis 1 that brains maintain growth rate to target size when  
11 developmental time is extended

| <b>Brain growth rate</b>     | <b>df</b> | <b>R<sup>2</sup> value</b> | <b>T value</b> | <b>P value</b> |
|------------------------------|-----------|----------------------------|----------------|----------------|
| Food = "25", Temp = "25"     |           |                            |                |                |
| Model 1                      | 65        | 0.8754                     | -1.325         | 0.19           |
| Model 2                      | 65        | 0.8754                     | 6.288          | 3.07e-08 ***   |
| Food = "10" & Temp ="25"     |           |                            |                |                |
| Model 1                      | 74        | 0.7718                     | 2.425          | 0.0178 *       |
| Model 2                      | 74        | 0.7718                     | 1.858          | 0.0671 .       |
| Food == "25" & Temp == "29"  |           |                            |                |                |
| Model 1                      | 67        | 0.5775                     | -1.312         | 0.194096       |
| Model 2                      | 67        | 0.5775                     | 3.700          | 0.000437 ***   |
| Food == "10" & Temp == "29") |           |                            |                |                |
| Model 1                      | 57        | 0.7683                     | -1.939         | 0.0575 .       |
| Model 2                      | 57        | 0.7683                     | 5.447          | 1.13e-06 ***   |

12 D.f: degrees of freedom. Sum Sq: Sum of squares. Significance codes: \* p<0.05, \*\* p<0.01, \*\*\* p<0.001. To support this  
13 hypothesis, model 1 should fit the brain/mushroom body data better than model 2 in poorer food conditions  
14

15 Table 2: Model to test that brains remain robust to changes in developmental time by changing  
 16 the time at which they turn on growth (hypothesis 2) or by changing both growth rates and the  
 17 time at which they turned on growth changed (hypothesis 3).

| Comparison       |          | Any constant differs             | Lag or Scaling Constant Differ | Lag Constant Differs | Scaling Constant differs | Intercept Differs |
|------------------|----------|----------------------------------|--------------------------------|----------------------|--------------------------|-------------------|
| Temperature (°C) | Food (%) | F value (all constants the same) | (a varies)                     | (a and c varies)     | (a and b varies)         | (b & c varies)    |
| 25               | 25 & 100 | 43.315***                        | 48.136***                      | 4.6947               | 0.0854                   | -                 |
| 25               | 10 & 25  | does not resolve                 | does not resolve               | does not resolve     | 2.772***                 | 3.4892***         |
| 25               | 10 & 100 | does not resolve                 | does not resolve               | does not resolve     | 3.673***                 | 2.1648*           |
| 29               | 25 & 100 | 0.8435                           | -                              | -                    | -                        | -                 |
| 29               | 10 & 25  | 33.158***                        | 16.125***                      | does not resolve     | 8.7448**                 | 4.9836            |
| 29               | 10 & 100 | 45.503***                        | 14.132***                      | does not resolve     | 3.0147                   | 2.8911            |
| 25 & 29          | 10       | 64.844***                        | 29.453***                      | 0.1876               | 5.2161*                  | -                 |
| 25 & 29          | 25       | 10.522***                        | 13.738***                      | 1.2351               | 7.3676**                 | -                 |
| 25 & 29          | 100      | 15.285***                        | 15.828***                      | 6.8819***            | 1.4653                   | -                 |

18 D.f: degrees of freedom. Sum Sq: Sum of squares. Significance codes: \* p<0.05, \*\* p<0.01, \*\*\* p<0.001, ‘.’ p<0.1.  
 19 To support hypothesis 2, the lag constant (b) should change, but not the scaling constant (c) and hypothesis 3, if  
 20 both (b) and (c) changes with altered developmental time. We applied Holm’s adjustment to the p-values to  
 21 account for multiple tests.

22  
 23

24 Table 3: The final relationship between whole brain and body size depends only on  
 25 temperature whereas the mushroom body/body size relationship depends on both diet and  
 26 temperature, with a significant two – way interaction.

|                                                       | Sum Sq  | Df | F value | P value       |
|-------------------------------------------------------|---------|----|---------|---------------|
| <b>Whole Brain Volume</b>                             |         |    |         |               |
| Prepupal Volume                                       | 0.04509 | 1  | 0.8123  | 0.371511      |
| Food                                                  | 0.00164 | 1  | 0.0295  | 0.864238      |
| Temp                                                  | 0.43744 | 1  | 7.8803  | 0.006978 **   |
| Prepupal Volume x Food                                | 0.10216 | 1  | 1.8404  | 0.180657      |
| Prepupal Volume x Temp                                | 0.02148 | 1  | 0.3870  | 0.536537      |
| Food x Temp                                           | 0.03836 | 1  | 0.6911  | 0.409514      |
| Prepupal Volume x Food x Temp                         | 0.04492 | 1  | 0.8092  | 0.372417      |
| <b>Mushroom Body Volume</b>                           |         |    |         |               |
| Prepupal Volume                                       | 0.4282  | 1  | 7.1508  | 0.009941 **   |
| Food                                                  | 0.1020  | 1  | 1.7032  | 0.197510      |
| Temp                                                  | 0.3106  | 1  | 5.1860  | 0.026831 *    |
| Prepupal Volume x Food                                | 0.0162  | 1  | 0.2713  | 0.604640      |
| Prepupal Volume x Temp                                | 0.1316  | 1  | 2.1969  | 0.144211      |
| Food x Temp                                           | 0.2992  | 1  | 4.9964  | 0.029637 *    |
| Prepupal Volume x Food x Temp                         | 0.0614  | 1  | 1.0247  | 0.316011      |
| <b>Mushroom Body Volume<br/>by Whole Brain Volume</b> |         |    |         |               |
| Brain                                                 | 0.17491 | 1  | 3.6288  | 0.0622218.    |
| Food                                                  | 0.03948 | 1  | 0.8191  | 0.3695460     |
| Temp                                                  | 0.60644 | 1  | 12.5816 | 0.0008246 *** |
| Brain x Food                                          | 0.04823 | 1  | 1.0006  | 0.3217034     |
| Brain x Temp                                          | 0.95303 | 1  | 19.7724 | 4.495e-05 **  |
| Food x Temp                                           | 0.62825 | 1  | 13.0341 | 0.0006789 *** |
| Brain x Food x Temp                                   | 0.11305 | 1  | 2.3453  | 0.1316064     |

27 D.f: degrees of freedom. Sum Sq: Sum of squares. Significance codes: \* p<0.05, \*\* p<0.01, \*\*\* p<0.001, '.' p<0.1

28



29 SUPPLEMENTARY MATERTIAL

30  
31  
32  
33

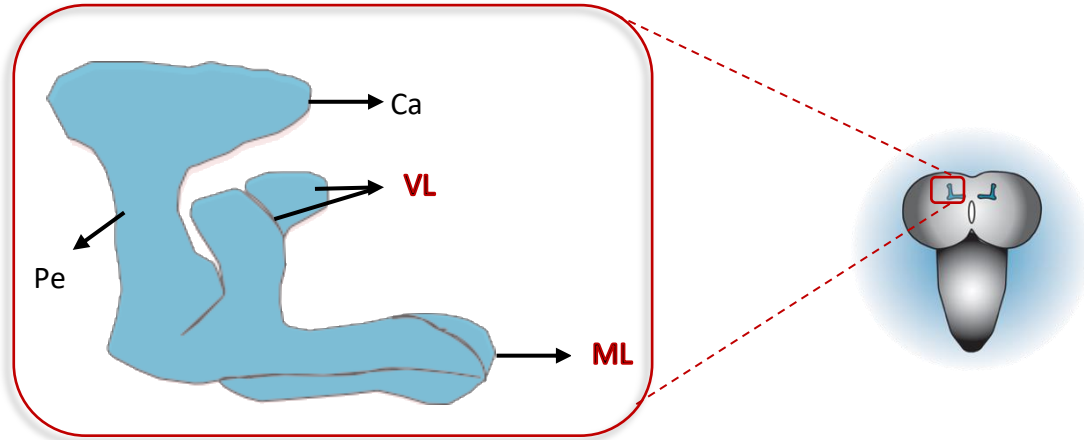

Supplementary Figure 1: Schematic of the dorsal view of mushroom body neuropil in the left hemisphere of brain of *Drosophila melanogaster* showing the Calyx (Ca), Peduncle (Pe), Vertical lobe (VL) and Medial lobe. Regions included in this study are labelled in red, the vertical and medial lobes only.

34

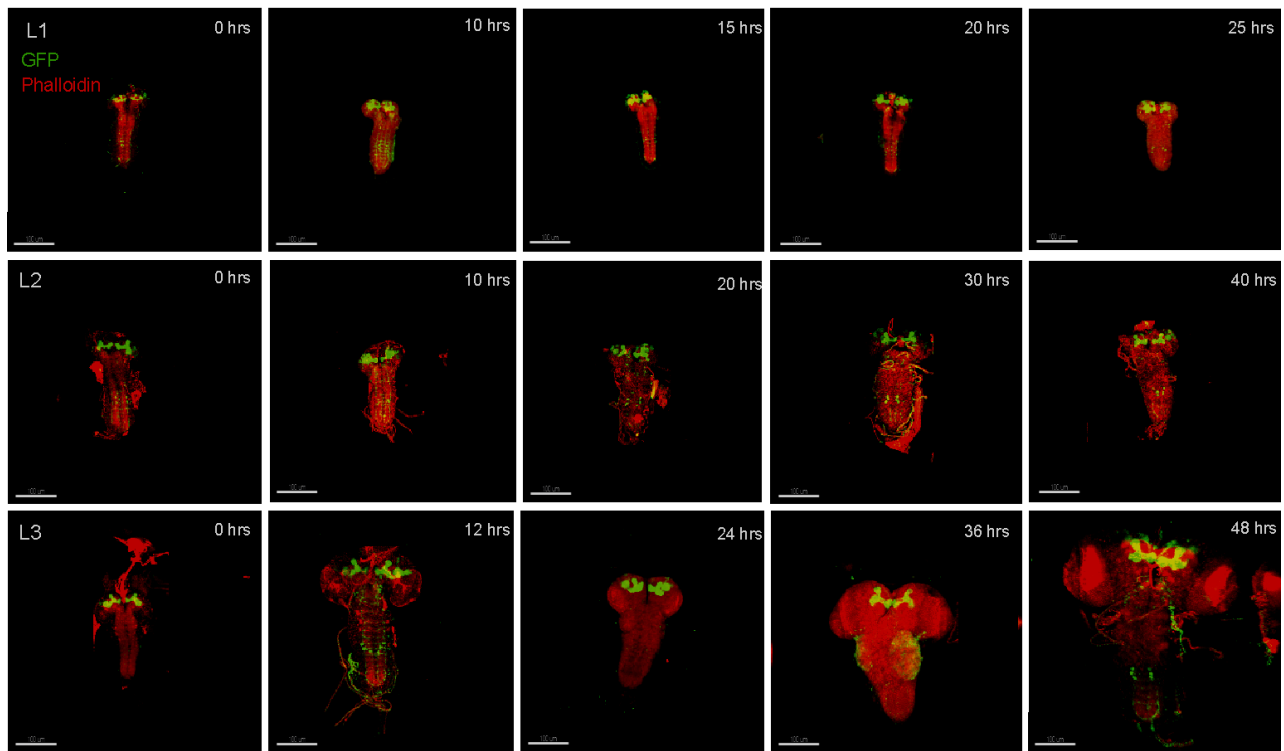

35

36

Supplementary Figure 2a: Changes in brain growth across larval stage of development. Larval brains expressing GFP in the neurons (green) of the mushroom body co-stained with phalloidin (red) across five developmental time points in the three larval stages. First instar (L1) A-E (0 hrs is relative to hatching), the second instar (L2) F-J (0 hours relative to the moult to L2) and the third instar (L3) K-P (0 hours relative to the moult to L3). At L3, the last two time points correspond to wandering and white prepupal stages. (Scale bar: 100 $\mu$ m)

37

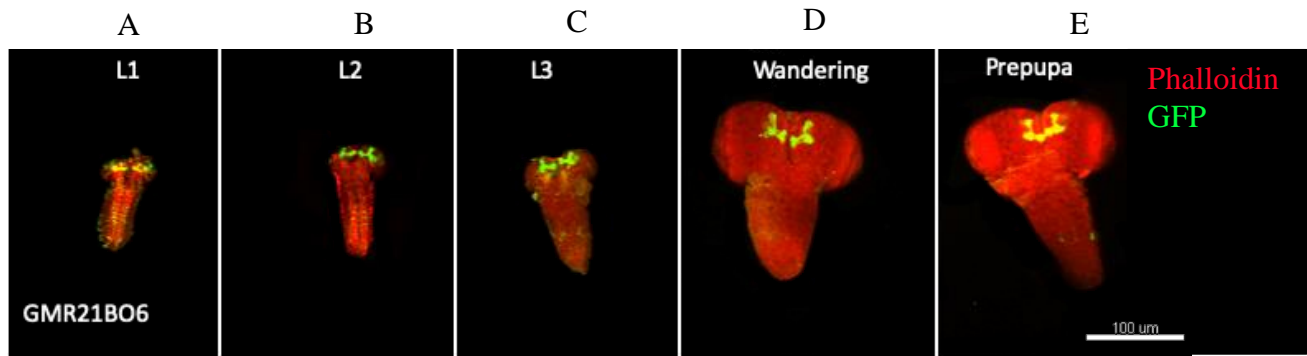

Supplementary Figure 2b: Larval brains expressing GFP in the neurons (green) of the mushroom body co-stained with phalloidin (red) across five different stages. (a-e) shows brains at 0hr of L1, L2, L3, wandering and white prepupae larval stages respectively.

38

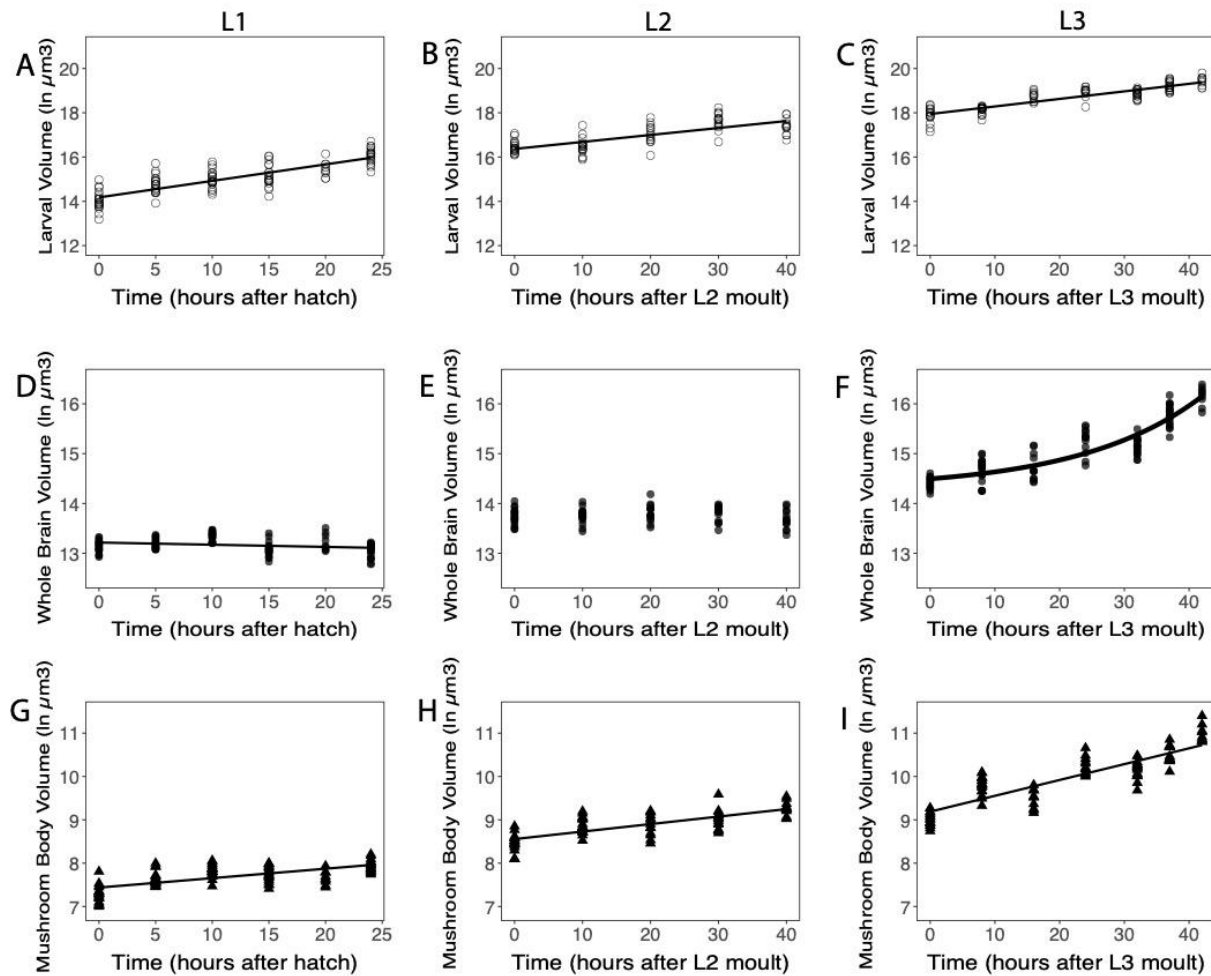

39

Supplementary Figure 3: Growth patterns of larval body, brain and mushroom body. The volume of the larval body (A-C), whole brain (D-F), and mushroom body (G-I) at L1 stage (A, D, G), L2 stage (B, E, H) and at L3 stage (C, F, I) measured from 0 hours after hatching/ larval moult to the end of the larval instar. At L3, the last two timepoints correspond to wandering and white prepupae larval stages. Each point shows individuals measured.

40

41

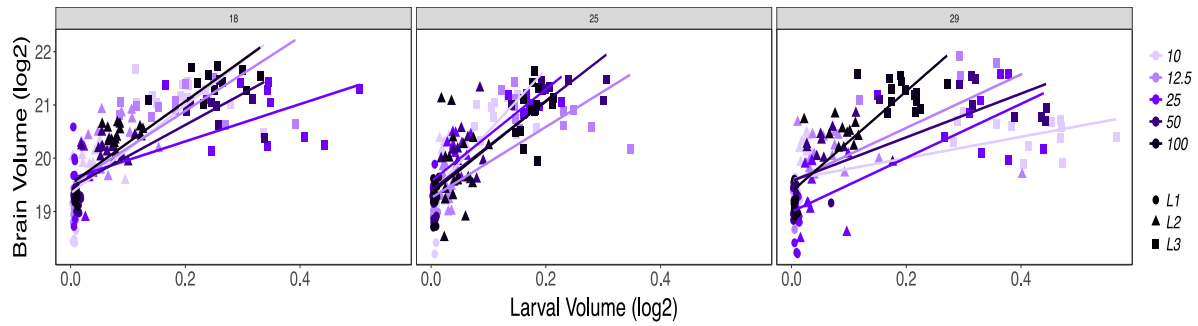

Supplementary Figure 4: showing the effect of temperature and nutrition on the brain volume across development. Each box represents the different temperatures, and the concentration of food is represented in the different colour codes where the highest food concentration is shown in black and the lowest food concentration is seen in lilac colour.

42

43

44



45

46 Supplementary Table 1: Linear regression models of larval volume, brain and mushroom body  
47 volume across the first, second and third instar stages of development.

| <b>Trait</b>  | <b>Stage</b> | <b>F stat</b> | <b>p value</b> | <b>R<sup>2</sup> Adj</b> |
|---------------|--------------|---------------|----------------|--------------------------|
| Larval Volume | L1           | 224.44        | < 2.2e-16      | 0.6762                   |
|               | L2           | 99.333        | 1.28E-15       | 0.5514                   |
|               | L3           | 374.65        | < 2.2e-16      | 0.7806                   |
| Brain Volume  | L1           | 6.1501        | 0.01472        | 0.04592                  |
|               | L2           | 0.0045        | 0.9468         | -0.0126                  |
|               | L3           | 372.81        | < 2.2e-16      | 0.7798                   |
| MB Volume     | L1           | 83.835        | 4.45E-15       | 0.4364                   |
|               | L2           | 99.097        | 1.35E-15       | 0.5508                   |
|               | L3           | 354.69        | < 2.2e-16      | 0.7711                   |

48 R<sup>2</sup> Adj: Adjusted R<sup>2</sup>. Significance codes: \* p<0.05, \*\* p<0.01, \*\*\* p<0.001, '.' p<0.1

49

50 Supplementary Table 2: Akaike's Information Criterion (AIC) and Bayesian Information Criteria  
51 (BIC) for modelling larval volume, brain and mushroom body volume in the third instar (L3)  
52 stage of development. Values for best fit are in blue.

| Trait         | Fit                                | AIC                      | BIC                      |
|---------------|------------------------------------|--------------------------|--------------------------|
| Body          | <a href="#">Volume.lmL3</a>        | 20.35881                 | <a href="#">28.34913</a> |
|               | Volume.lmL3poly                    | 19.63951                 | 30.29327                 |
|               | Volume.expL3                       | 30.84764                 |                          |
|               | Volume.explagL3_100                |                          | 38.83796                 |
|               | Volume.powerL3                     | 118.6141                 | 126.6044                 |
| Brain         | Brain.lmL3                         | 36.96086                 | 44.95118                 |
|               | Brain.lmL3poly                     | 18.70613                 | 29.35988                 |
|               | Brain.expL3                        | 19.51189                 | 27.5022                  |
|               | <a href="#">Brain.explagL3_100</a> | <a href="#">12.13046</a> | <a href="#">22.78422</a> |
|               | Brain.powerL3                      | 156.5104                 | 164.5007                 |
| Mushroom Body | <a href="#">MB.lmL3</a>            | <a href="#">40.93267</a> | <a href="#">48.92299</a> |
|               | MB.lmL3poly                        | 42.85683                 | 53.51059                 |
|               | MB.expL3                           | 42.70775                 | 50.69807                 |
|               | MB.explagL3_100                    | 42.80673                 | 53.46049                 |

53 lm: linear model, poly: polynomial, exp: exponential model, explag: lagged exponential model.

54 Supplementary Table 3: Growth rates of the larval body, brain and mushroom bodies depend  
 55 on nutritional and thermal conditions. Larval body and mushroom body volumes were fit with  
 56 linear models (lm). Brain volumes were fit with second order polynomial models with Time as  
 57 (Time, 2, raw = TRUE).

| <b>Larval Volume</b>                | <b>Sum Sq</b> | <b>Df</b> | <b>F value</b> | <b>P value</b> |
|-------------------------------------|---------------|-----------|----------------|----------------|
| Time                                | 58.358        | 1         | 402.9612       | <2.2e-16 ***   |
| Food                                | 19.295        | 2         | 66.6153        | < 2.2e-16 ***  |
| Temp                                | 0.051         | 1         | 0.3500         | 0.554400       |
| Time x Food                         | 16.805        | 2         | 58.0189        | < 2.2e-16 ***  |
| Time x Temp                         | 1.358         | 1         | 9.3796         | 0.002328 **    |
| Food x Temp                         | 0.429         | 2         | 1.4828         | 0.228125       |
| Time x Food x Temp                  | 1.755         | 2         | 6.0605         | 0.002532 **    |
| <b>Brain Volume</b>                 |               |           |                |                |
| (Time, 2, raw = TRUE)               | 89.118        | 2         | 601.0508       | < 2.2e-16 ***  |
| Food                                | 2.620         | 2         | 17.6721        | 4.178e-08 ***  |
| Temp                                | 5.342         | 1         | 72.0532        | 3.331e-16 ***  |
| (Time, 2, raw = TRUE) x Food        | 13.364        | 4         | 45.0669        | < 2.2e-16 ***  |
| (Time, 2, raw = TRUE) x Temp        | 6.363         | 2         | 42.9132        | < 2.2e-16 ***  |
| Food x Temp                         | 14.659        | 2         | 98.8697        | < 2.2e-16 ***  |
| (Time, 2, raw = TRUE) x Food x Temp | 2.207         | 4         | 7.4441         | 8.318e-06***   |
| <b>Mushroom Body Volume</b>         |               |           |                |                |
| Time                                | 51.040        | 1         | 371.8073       | < 2.2e-16 ***  |
| Food                                | 2.806         | 2         | 10.2220        | 4.576e-05 ***  |
| Temp                                | 0.012         | 1         | 0.0880         | 0.7669         |
| Time x Food                         | 25.315        | 2         | 92.2044        | < 2.2e-16 ***  |
| Time x Temp                         | 0.081         | 1         | 0.5931         | 0.4416         |
| Food x Temp                         | 6.580 2       | 2         | 23.9649        | 1.318e-10 ***  |
| Time x Food x Temp                  | 0.104 2       | 2         | 0.3788         | 0.6849         |

58 D.f: degrees of freedom. Sum Sq: Sum of squares. Significance codes: \* p<0.05, \*\* p<0.01, \*\*\* p<0.001, '.' p<0.1

59

## 60 **Materials and Methods**

### 61 **Fly strains and husbandry**

62 *Drosophila* stocks were reared at 25°C with 65% humidity, on a 12-hour light/dark cycle and  
63 maintained on sucrose-yeast (SY) diet (detailed below). To drive the expression of green  
64 fluorescent protein (GFP) in the mushroom body neurons, we used the R21B06-GAL4 line (BDSC  
65 68318), known to be expressed in the mushroom bodies of larval and adult brains  
66 (<http://flweb.janelia.org/cgi-bin/flew.cgi>; (Jenett et al., 2012; Pfeiffer et al., 2008). This line was  
67 crossed with a membrane-tagged GFP reporter ( $w[*]$ ;  $P[y[+t7.7] w[+mC]=10XUAS-IVS-$   
68  $myr::GFP]attP2$ ). These stocks were obtained from the Bloomington *Drosophila* Stock Center,  
69 Indiana University, Bloomington.

### 70 **Media and larval rearing and staging conditions**

71 Sucrose/Yeast (SY) diet was prepared as reported by (Toivonen et al., 2007), with 100g  
72 autolyzed Brewer's Yeast, 50 g sucrose, 10 g agar, 1.5 ml propionic acid, 15 ml Nipagin M  
73 solution dissolved in 1 L of distilled water. In addition to the standard diet (100% SY), we  
74 exposed larvae to additional experimental diets, which contained 10% and 25% of the caloric  
75 content of the standard SY diet. These diets were made by adding appropriate amounts of the  
76 original Brewer's yeast and sucrose to the same concentration of agar and water. 25% food  
77 contained 25 g autolyzed Brewer's Yeast and 12.5 g sucrose, while 10% food contained 10 g  
78 autolyzed Brewer's Yeast and 5 g sucrose, dissolved in 1 L of distilled water. All diets were  
79 allowed to cool to 60° before the preservatives (propionic acid and Nipagin M) were added and  
80 the food dispensed.

81 Egg collection was carried out on normal diet without additional yeast for age  
82 synchronization. 100-150 eggs were transferred to a 60 x 15mm petri dish to control for  
83 population density. Newly-hatched first instar larva were collected in two hour cohorts starting  
84 24 h after egg lay. These newly-hatched larvae were then staged to the appropriate time before  
85 imaging for body size measurements and dissection. To collect staged L2 and L3 larvae, we  
86 collected newly-moulted second and third larval stages, determined by their anterior spiracle  
87 morphology, in 2 hour cohorts as in (Mirth et al., 2005). These larvae were then staged to the  
88 desired time before imaging and dissection. To determine the duration from third instar to the  
89 white prepupal stage, L3 larvae were observed every 8 hours until all larvae pupariated. We  
90 defined pupariation as cessation of movement with evaginated spiracles (Koyama et al., 2014).  
91 Animals were raised at a control temperature of 25°C and experimental temperature of 29°C.  
92 All experiments were performed in three replicates on a 12 hr:12 hr light:dark cycle at 65%  
93 humidity.

### 94 **Image analysis and brain size measurement**

95 Z-stack images were obtained from brain samples using the Leica Sp8 confocal microscope  
96 and 3-Dimensional volume was reconstructed with the Imaris© (Bitplane) software. Image  
97 normalization was performed to ensure standardized measurements across images with  
98 different signal intensities, and 3D analysis of the brain was done by software's in-built wizard.  
99 Images were rendered, and brain size measurement was gotten as 3D volumes using the  
100 surface analysis tool on Imaris.

101

102

103 **Body size measurement, organ dissection, and immunocytochemistry**

104 Animals picked at the relevant time points were first placed in cold PBS solution, to  
105 immobilize them, and then imaged using a Zeiss Stemi 508 dissecting microscope before  
106 dissection. These images were analyzed using the FIJI (ImageJ, Version 2.0.0-rc-69/1.52i, 2019)  
107 software. The length and width of the larva or pupa was measured using the straight-line tool,  
108 and volume was calculated using the formula  $lw^2$  (length x width<sup>2</sup>).

109 After measuring each larva/pupa, we dissected out their brain in cold 1x Phosphate  
110 Buffered Saline (1xPBS) under a Leica S9E dissecting microscope according to methods  
111 previously described (Daul et al., 2010; Hafer & Schedl, 2006). Isolated brains were fixed  
112 overnight in 4% paraformaldehyde at 4°C. After four washes in a solution of cold 0.3% Triton X-  
113 100 in PBS (PBT) for 20 minutes each, samples were incubated in 2% normal donkey serum  
114 block solution prior to immunostaining. The blocked tissue samples were then transferred to  
115 Acti-stain™ 670 Phalloidin (1:1200, Cytoskeleton Cat#: PHDN1) reagent diluted in PBT and  
116 normal donkey serum, and incubated on a rocking platform shaker in the dark for 2-3days at  
117 4°C. Prior to imaging, samples were rinsed in cold PBS, and PBS was replaced with 25% KY jelly  
118 in water solution. Samples were imaged using the Leica SP8 HyD microscope with 40x water  
119 immersion objective.

120 **Image processing and statistical analysis**

121 Data analyses were carried out in R Studio (Version 1.2.5019<sup>©</sup> 2009-2019 RStudio, Inc.). We  
122 fit our body and organ size data with both linear, using the *lm* function, and non-linear models,  
123 using the *nls* package (Baty et al., 2015). We used AIC and BIC to assess model fit, selecting the  
124 simplest models when these values were similar. Data visualization was conducted using the  
125 ggplot package (Wickham, 2016) in R Studio (Version 1.2.5019<sup>©</sup> 2009-2019 RStudio, Inc.).

126

127

128
